# Supplementary material for: Secretory SERPINE1 Expression Is Increased by Antiplatelet Therapy, Inducing MMP1 Expression and Increasing Colon Cancer Metastasis
Source: MDPI journal article supplement (doi:10.3390/ijms23179596), 2022-08-24
Supplement: s1 [file s1]

**Supplementary Table S1. qRT-PCR primer set**

| Primer name  | Primer sequence               | length | Product size |
|--------------|-------------------------------|--------|--------------|
| β-Actin F    | 5'-CCCTGGAGAAGAGCTACGAG-3'    | 20 mer | 132 bp       |
| β-Actin R    | 5'-AGGTAGTTTCGTGGATGCCA-3'    | 18 mer |              |
| MMP1 F       | 5'-TTTGGCTTCCCTAGAACTGTG-3'   | 21 mer | 146 bp       |
| MMP1 R       | 5'-GCTATCATTTTGGGATAACCTGG-3' | 23 mer |              |
| MMP2 F       | 5'-AATGCCATCCCCGATAACC-3'     | 19 mer | 123 bp       |
| MMP2 R       | 5'-TCCAAACTTCACGCTCTTCAG-3'   | 21 mer |              |
| MMP7 F       | 5'-TCACTTCGATGAGGATGAACG-3'   | 21 mer | 105 bp       |
| MMP7 R       | 5'-GAATGTCCCATACCCAAAGAATG-3' | 23 mer |              |
| MMP9 F       | 5'-GGAGGTTTCGACGTGAAGG-3'     | 18 mer | 130 bp       |
| MMP9 R       | 5'-TCCTGGCAGAAATAGGCTTTC-3'   | 21 mer |              |
| MMP13 F      | 5'-TGCAGCTGTTCACTTTGAGG-3'    | 20 mer | 138 bp       |
| MMP13 R      | 5'-TCACCAATTCCTGGGAAGTCT-3'   | 21 mer |              |
| MMP14 F      | 5'-TGATGCTGCTCTCTTCTGGA-3'    | 20 mer | 105 bp       |
| MMP14 R      | 5'-GGGTACTCGCTATCCACTGC-3'    | 20 mer |              |
| SERPINE1 F   | 5'-GTGGACTTTTCAGAGGTGGAG-3'   | 21 mer | 144 bp       |
| SERPINE1 R   | 5'-GAAGTAGAGGGCATTCAACCAG-3'  | 21 mer |              |
| E-cadherin F | 5'-GCAGTGACGAATGTGGTACC-3'    | 20 mer | 182 bp       |
| E-cadherin R | 5'-GTGTCTGGCTCCTGGGCAGT-3'    | 20 mer |              |
| N-cadherin F | 5'-GAATTCAGCACCCGCCTCAG -3'   | 20 mer | 172 bp       |
| N-cadherin R | 5'-GCTGCATATATCGATCTGGG-3'    | 20 mer |              |
| TWIST F      | 5'-CTACGCCTTCTCGGTCTG-3'      | 18 mer | 121 bp       |
| TWIST R      | 5'-CTTCTCTGGAAACAATGACATCT-3' | 23 mer |              |
| SLUG F       | 5'-TTCACTCCGAAGCCAAATG-3'     | 19 mer | 121 bp       |
| SLUG R       | 5'-TCTCTCTGTGGGTGTGTG-3'      | 18 mer |              |
| SNAIL F      | 5'-CCACAAGCACCAAGAGTC-3'      | 18 mer | 136 bp       |
| SNAIL R      | 5'-TGGCAGTGAGAAGGATGT-3'      | 18 mer |              |
| ZEB1 F       | 5'-TGTGCCAATTTGTTCTCTGTA-3'   | 20 mer | 113 bp       |
| ZEB1 R       | 5'-TGAGATGGGAGTCTGGTAAA-3'    | 20 mer |              |

**Supplementary Table S2. Plasmids construction primer set**

| Primer name                          | Primer sequence                         | length |
|--------------------------------------|-----------------------------------------|--------|
| SERPINE1 OVER ( <i>Hind</i> III)     | 5'-GATCAAGCTTACCATGCAGATGTCTCCAGCCCT-3' | 33 mer |
| SERPINE1 OVER ( <i>Xho</i> I)        | 5'-GATCCTCGAGCGGGGTTCCATCACTTGGCC-3'    | 30 mer |
| SERPINE1 promoter ( <i>Nhe</i> I)    | 5'-GATCGCTAGCGCTGGCTGCTTAACCAAAC-3'     | 30 mer |
| SERPINE1 promoter ( <i>Hind</i> III) | 5'-GATCAAGCTTTAGAGTCGCTGGGAAGCTGT-3'    | 30 mer |
| MMP1 promoter ( <i>Kpn</i> I)        | 5'-GATCGGTACCCACACCTCCAACCTCAGCCA-3'    | 19 mer |
| MMP1 promoter ( <i>Xho</i> I)        | 5'-GATCCTCGAGCAGGACTAGGCAGGTGAGGG-3'    | 21 mer |

## Supplementary Figure S1

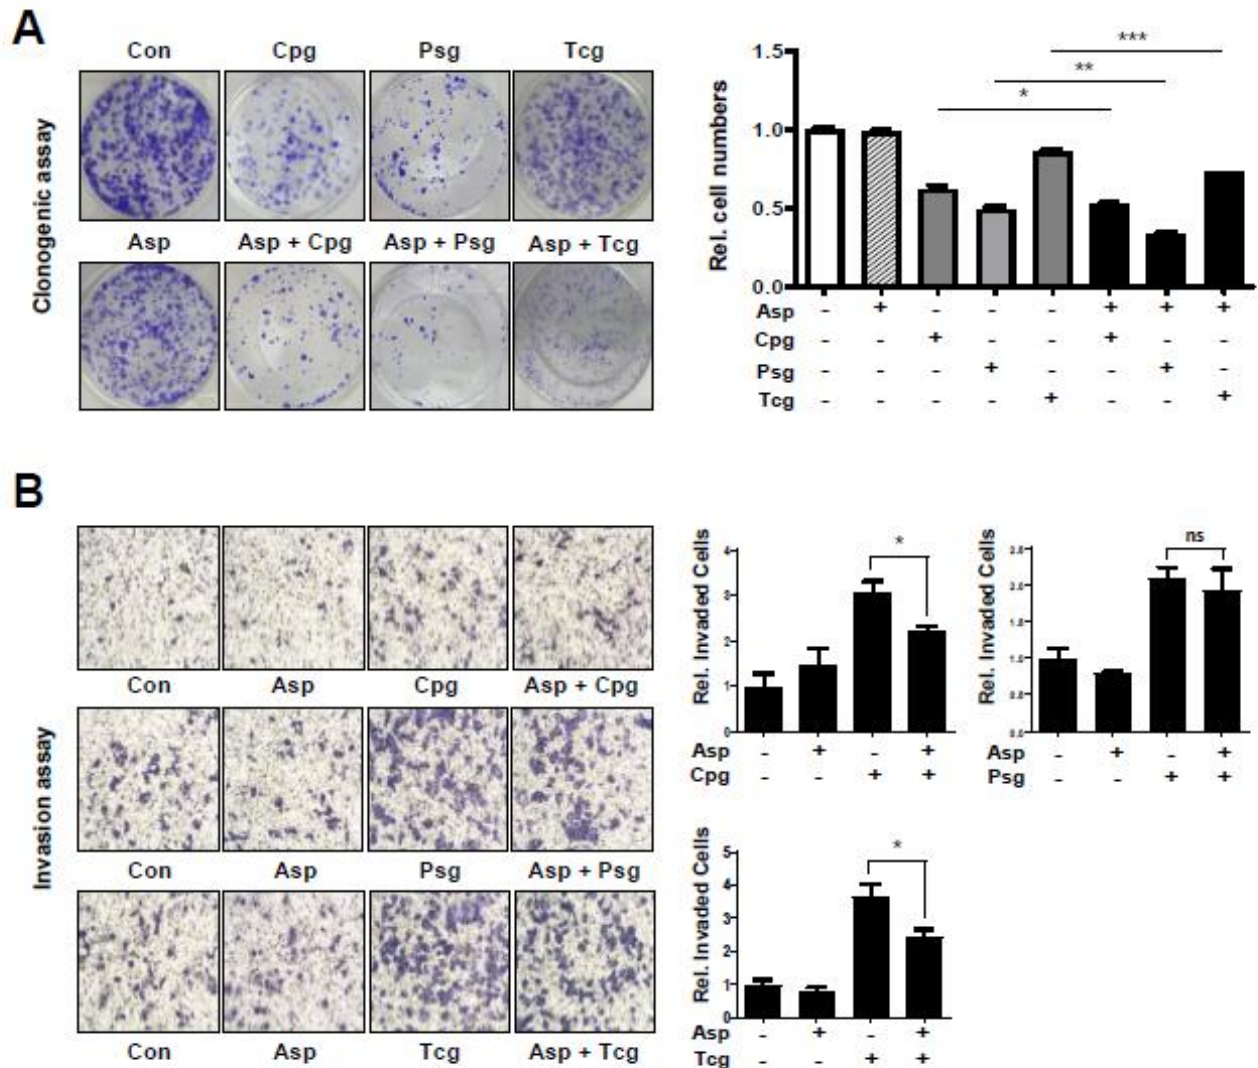

**Figure S1. The synergistic effect of each purinergic antiplatelet agent and aspirin was investigated in HCT116 human colon cancer cells.** Cells were treated with each of the purinergic antiplatelet agents (1000  $\mu$ M Asp, 100  $\mu$ M Cpg, 100  $\mu$ M Psg and 20  $\mu$ M Tcg) alone or in combination with Asp, followed by (A) cell proliferation and (B) invasion. Compared with the use of each purinergic antiplatelet agent alone, it was confirmed that when administered in combination with aspirin, it showed some inhibition of both cell proliferation and invasiveness. Statistical significance was determined using ordinary two-way ANOVA and student's *t*-tests, *ns*, not significant; \*,  $P < 0.05$ ; \*\*,  $P < 0.01$ ; \*\*\*,  $P < 0.001$ ,  $n \geq 3$  per group.

## Supplementary Figure S2

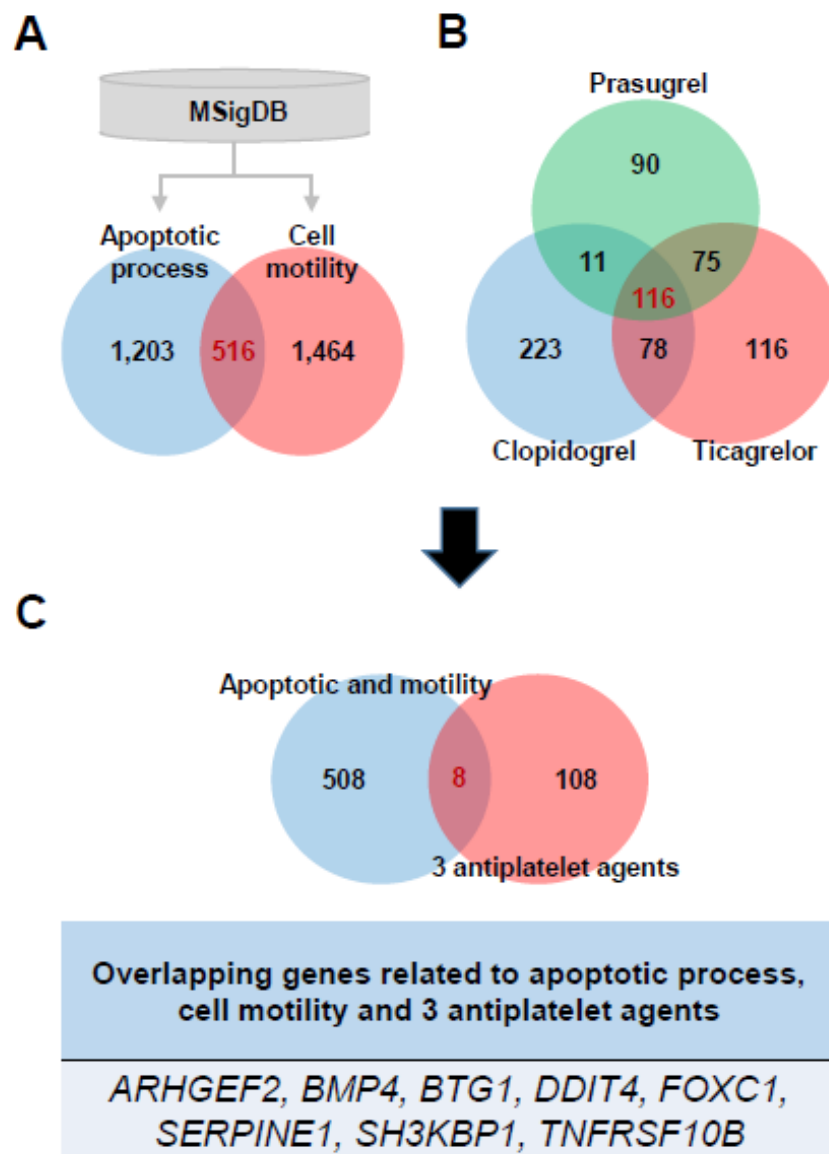

**Figure S2. Identification of commonly expressed candidate genes by comparing genes related to cell motility and apoptosis with genes co-expressed by treatment with 3 antiplatelet agents.** (A) Common genes related to apoptotic process and cell motility in MSigDB. (B) Common genes related to treatment with 3 antiplatelet agents. Statistically significant common genes were selected using fold change and student's *t*-tests. (2-fold change and  $P < 0.001$ ). (C) The eight overlapping genes associated with apoptotic process, cell motility, and 3 antiplatelet agents.

## Supplementary Figure S3

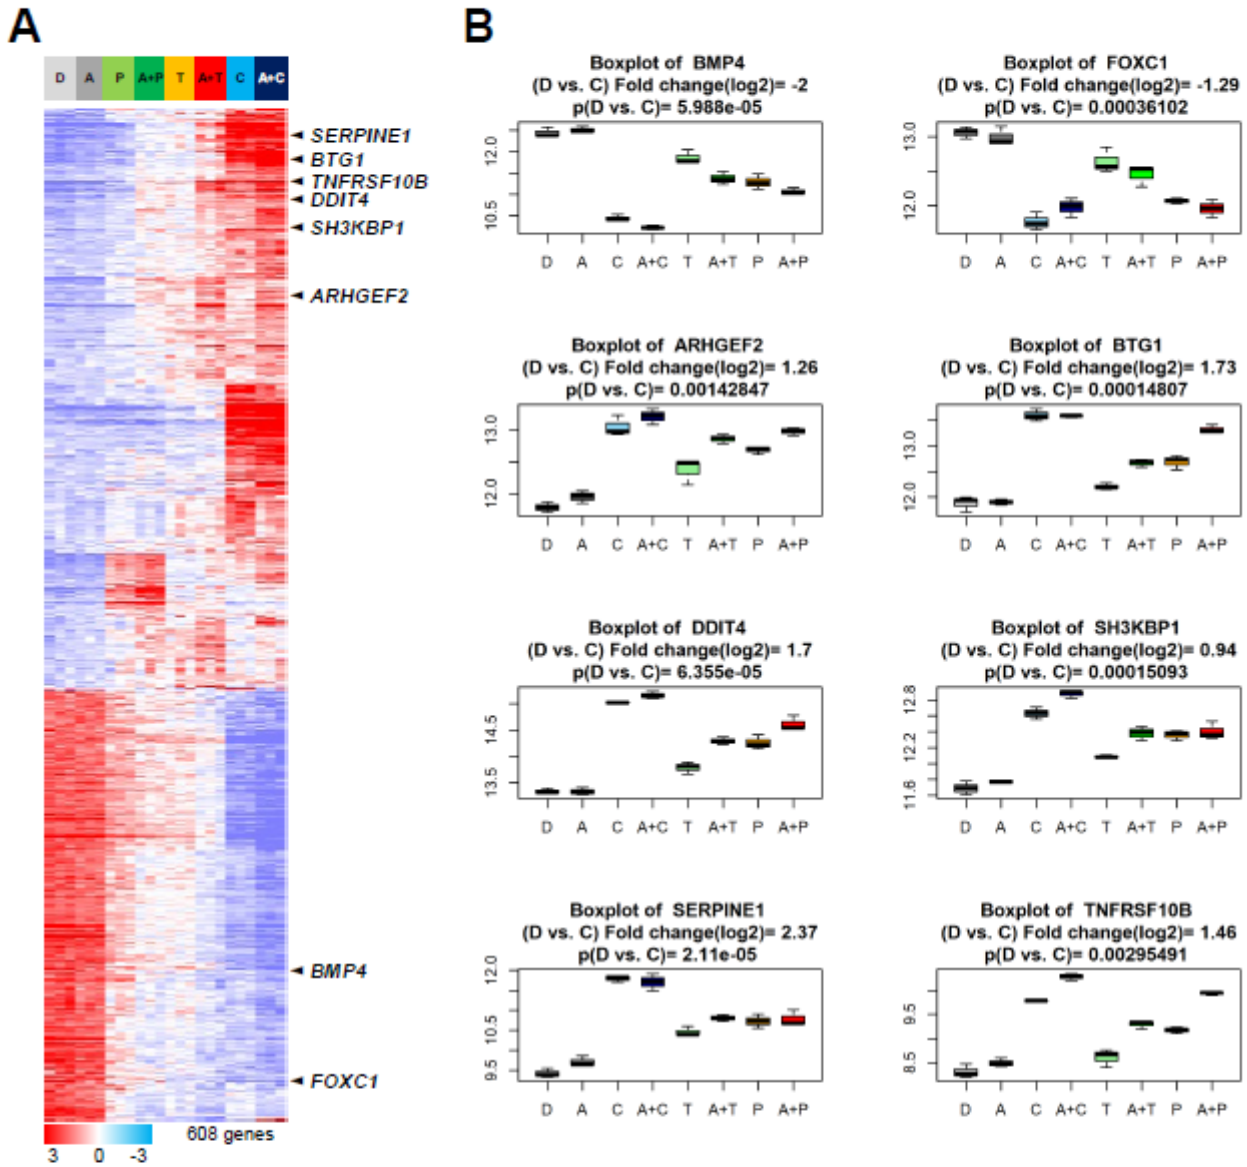

**Figure S3. Expression patterns and boxplot of eight candidate genes.** (A) Expression patterns of eight candidate genes were confirmed in heatmap of Figure 3A. D, DMSO and A, aspirin were control groups, and the samples treated with 3 antiplatelet agents (P, prasugrel; T, ticagrelor; C, clopidogrel) and were comparison groups (D and A vs. P and A+P, T and A+T, C and A+C). (B) Expression level of eight candidate genes were confirmed by boxplot in each sample. Fold change was calculated on a log2 scale and p-value were calculated by student's *t*-tests.

## Supplementary Figure S4

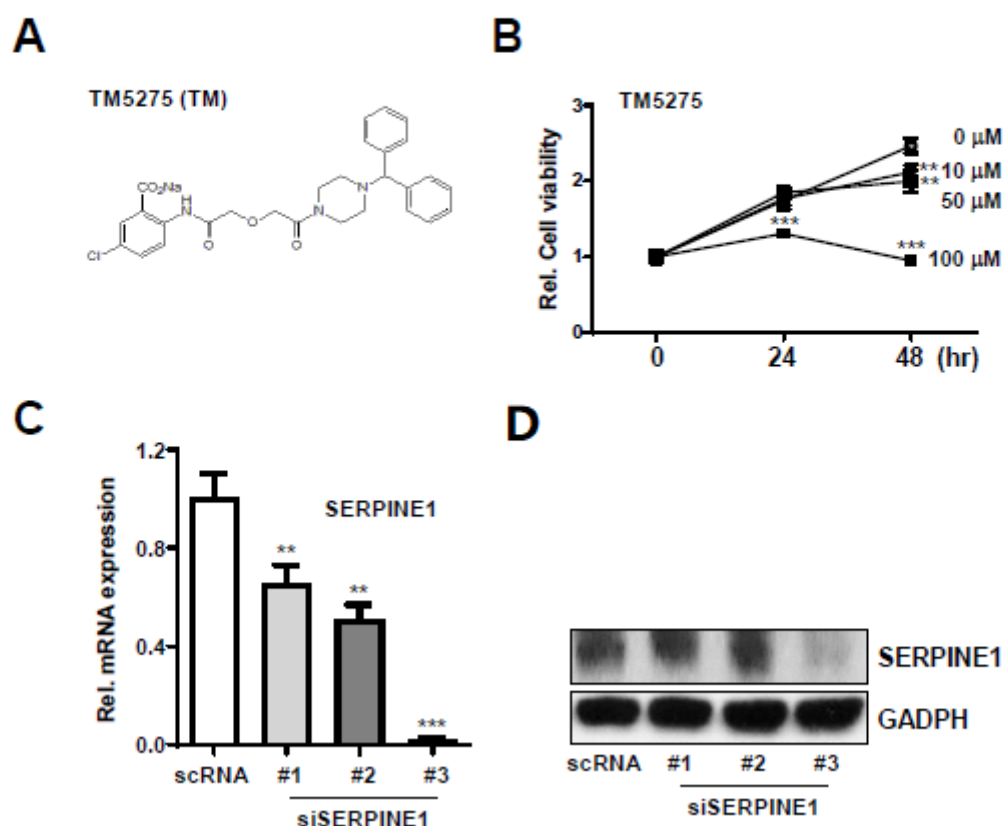

Figure S4. The effect of the reduction of SERPINE1 expression on cell invasion was confirmed. (A) Structure of TM5275, known as an inhibitor of SERPINE1. (B) Cell viability was determined by MTT assay for various concentrations of TM5275 (0, 10, 50 and 100  $\mu$ M). (C and D), inhibition of SERPINE1 (C) mRNA and (D) protein expression was confirmed using three different siRNAs. Statistical significance was determined using ordinary two-way ANOVA and student's *t*-tests, \*\*,  $P < 0.01$ ; \*\*\*,  $P < 0.001$ ,  $n \geq 3$  per group.



**A**

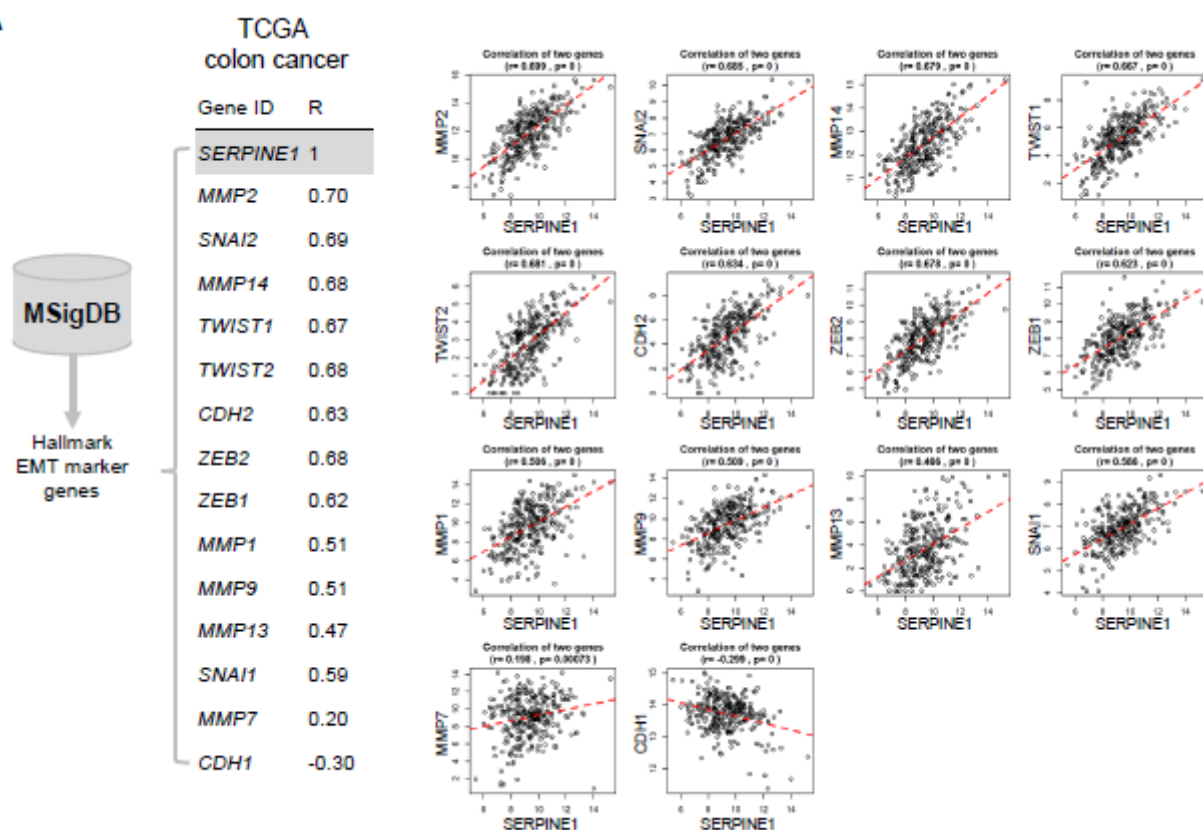

**B**

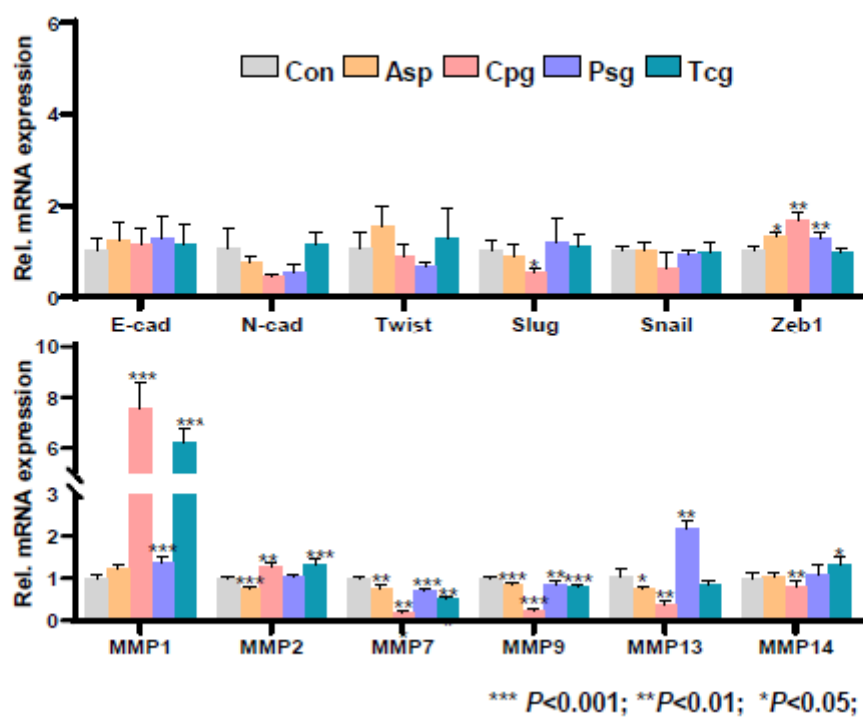

**Figure S5. Confirmation of association between SERPINE1 and EMT factor, MMP1.** (A) Genes of the cancer Hallmark EMT marker in MSigDB were selected, and the correlation with the SERPINE1 was calculated in the TCGA colon cancer cohort. (B) MMP1, one of the EMT factors, increased by antiplatelet was identified (red box). Statistical significance was determined using ordinary two-way ANOVA and student's *t*-tests, \*,  $P < 0.05$ ; \*\*,  $P < 0.01$ ; \*\*\*,  $P < 0.001$ ,  $n \geq 3$  per group.



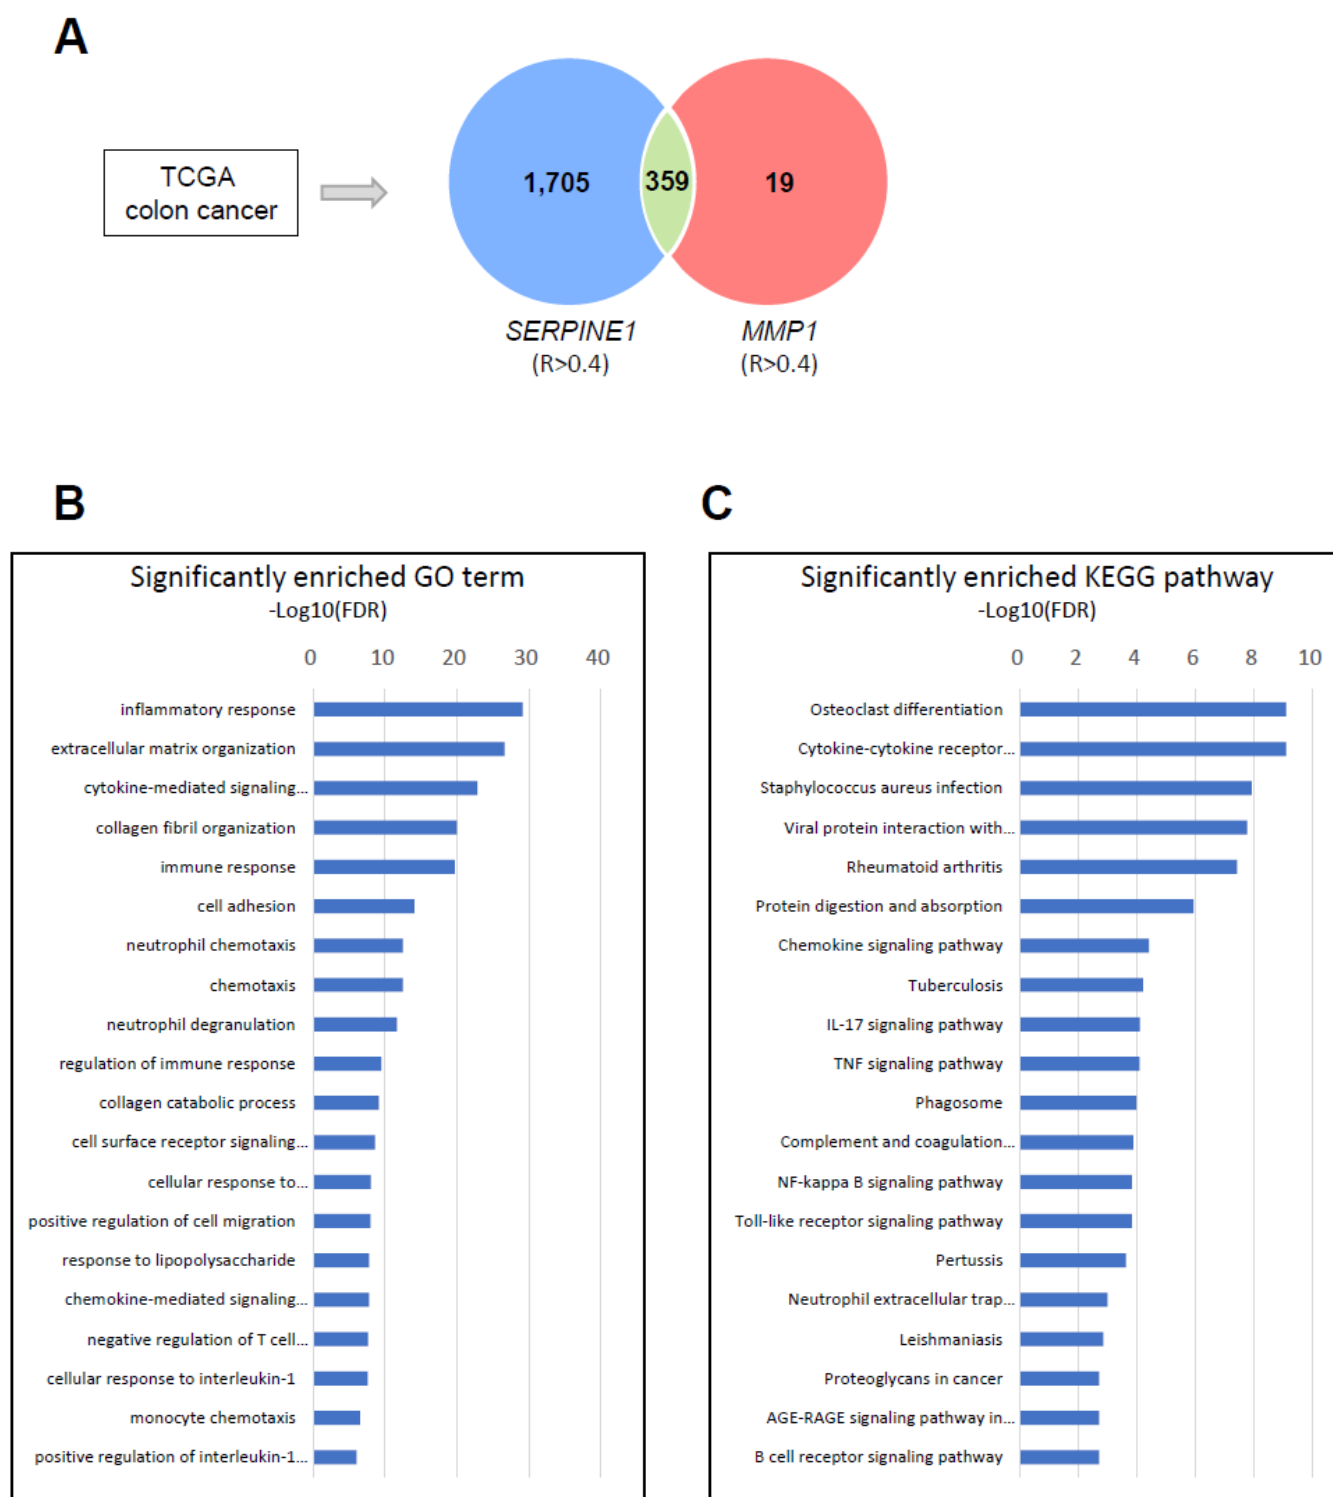

**Figure S6. Confirmation and DAVID analysis of genes related to the expression pattern of *SERPINE1* and *MMP1*.** (A) Common genes to the expression pattern of *SERPINE1* and *MMP1* were identified in the TCGA colon cancer. (B) Gene Ontology and (C) KEGG pathway analysis were visualized based on FDR values.
